# Supplementary material for: Nitrogen adsorption on Nb2C6H4+ cations: the important role of benzyne (ortho-C6H4)
Source: Royal Society of Chemistry journal article supplement (doi:10.1039/d3cp05524h), 2024-01-01
Supplement: d3cp05524h1.pdf [file d3cp05524h1.pdf]

# Nitrogen Adsorption on $\text{Nb}_2\text{C}_6\text{H}_4^+$ Cations: The Important Role of Benzyne (*Ortho*- $\text{C}_6\text{H}_4$ )

*Feng-Xiang Zhang, Yi-Heng Zhang, Ming Wang, Jia-Bi Ma\**

Key Laboratory of Cluster Science of Ministry of Education, Beijing Key Laboratory of Photoelectronic/Electrophotonic Conversion Materials, School of Chemistry and Chemical Engineering, Beijing Institute of Technology, Beijing 102488, China

\*Jia-Bi Ma, Email: [majiabi@bit.edu.cn](mailto:majiabi@bit.edu.cn)

**Table S1.** DFT-calculated and experimental bond dissociation energies.

| Method             | Exp              | Nb-Nb       | Nb-C        | Nb-N        | N≡N         | C-C         | C-H         | C≡N         | H-H         | N-H         | MSE         | RMSE        | MAE         |
|--------------------|------------------|-------------|-------------|-------------|-------------|-------------|-------------|-------------|-------------|-------------|-------------|-------------|-------------|
|                    | References       | 1           | 2           | 3           | 4           | 4           | 4           | 4           | 5           | 4           |             |             |             |
| Hybrid Functionals | <b>B1B95</b>     | 3.67        | 5.04        | 5.92        | 9.44        | 6.01        | 3.35        | 7.42        | 4.38        | 3.35        | 0.43        | 0.66        | 0.50        |
|                    | <b>B1LYP</b>     | 3.69        | 4.85        | 5.99        | 9.33        | 5.77        | 3.43        | 7.25        | 4.44        | 3.49        | 0.49        | 0.70        | 0.54        |
|                    | <b>B3LYP</b>     | 4.05        | 5.09        | 6.25        | 9.60        | 5.98        | 3.49        | 7.51        | 4.50        | 3.56        | 0.24        | 0.49        | 0.35        |
|                    | <b>B3P86</b>     | 3.89        | 5.02        | 6.26        | 9.78        | 6.24        | 3.59        | 7.74        | 4.57        | 3.66        | 0.29        | 0.53        | 0.34        |
|                    | <b>B3PW91</b>    | 3.43        | 5.16        | 5.91        | 9.43        | 6.08        | 3.42        | 7.49        | 4.37        | 3.46        | 0.51        | 0.71        | 0.47        |
|                    | <b>M05</b>       | 5.99        | 6.41        | 6.92        | 9.36        | 6.11        | 3.45        | 7.54        | 4.41        | 3.41        | 0.20        | 0.44        | 0.35        |
|                    | <b>M052X</b>     | 4.48        | 5.44        | 6.14        | 9.46        | 5.82        | 3.38        | 7.24        | 4.36        | 3.37        | 0.16        | 0.40        | 0.36        |
|                    | <b>PBE0</b>      | 3.32        | 4.87        | 5.85        | 9.42        | 6.10        | 3.38        | 7.48        | 4.25        | 3.43        | 0.62        | 0.79        | 0.56        |
|                    | <b>X3LYP</b>     | 4.03        | 5.09        | 6.23        | 9.58        | 5.97        | 3.48        | 7.49        | 4.47        | 3.55        | 0.25        | 0.50        | 0.36        |
|                    | <b>M06</b>       | 5.92        | 6.10        | 6.53        | 9.27        | 6.04        | 3.43        | 7.48        | 4.38        | 3.33        | 0.14        | 0.37        | 0.30        |
|                    | <b>M062X</b>     | 4.39        | 5.64        | 6.25        | 9.44        | 5.91        | 3.38        | 7.38        | 4.40        | 3.34        | 0.14        | 0.38        | 0.30        |
|                    | <b>BHANDHLYP</b> | 2.42        | 4.11        | 5.12        | 8.63        | 5.08        | 3.36        | 6.55        | 4.42        | 3.34        | 2.03        | 1.43        | 1.19        |
|                    | <b>BMK</b>       | 3.74        | 5.11        | 6.49        | 9.49        | 5.77        | 3.40        | 7.40        | 4.37        | 3.45        | 0.35        | 0.60        | 0.42        |
| Pure Functionals   | <b>M06L</b>      | <b>5.39</b> | <b>6.05</b> | <b>6.70</b> | <b>9.41</b> | <b>6.34</b> | <b>3.37</b> | <b>7.76</b> | <b>4.21</b> | <b>3.33</b> | <b>0.06</b> | <b>0.24</b> | <b>0.22</b> |
|                    | <b>BLYP</b>      | 5.19        | 5.66        | 6.94        | 10.09       | 6.35        | 3.50        | 8.04        | 4.47        | 3.63        | 0.04        | 0.22        | 0.18        |
|                    | <b>BPW91</b>     | 4.42        | 5.43        | 6.55        | 9.95        | 6.50        | 3.43        | 8.05        | 4.31        | 3.53        | 0.11        | 0.34        | 0.25        |
|                    | <b>BP86</b>      | 5.00        | 5.70        | 6.92        | 10.25       | 6.61        | 3.61        | 8.25        | 4.56        | 3.74        | 0.12        | 0.34        | 0.32        |
|                    | <b>BPBE</b>      | 4.43        | 5.44        | 6.55        | 9.95        | 6.51        | 3.41        | 8.05        | 4.29        | 3.52        | 0.11        | 0.34        | 0.25        |
|                    | <b>PBE</b>       | 4.88        | 5.72        | 6.85        | 10.24       | 6.72        | 3.47        | 8.31        | 4.27        | 3.59        | 0.13        | 0.36        | 0.32        |
|                    | <b>TPSS</b>      | 4.47        | 5.35        | 6.45        | 9.53        | 6.20        | 3.57        | 7.66        | 4.62        | 3.65        | 0.10        | 0.31        | 0.24        |

MSE, RMSE and MAE represents mean square error, root mean square error and mean absolute error, respectively.

Unit: eV

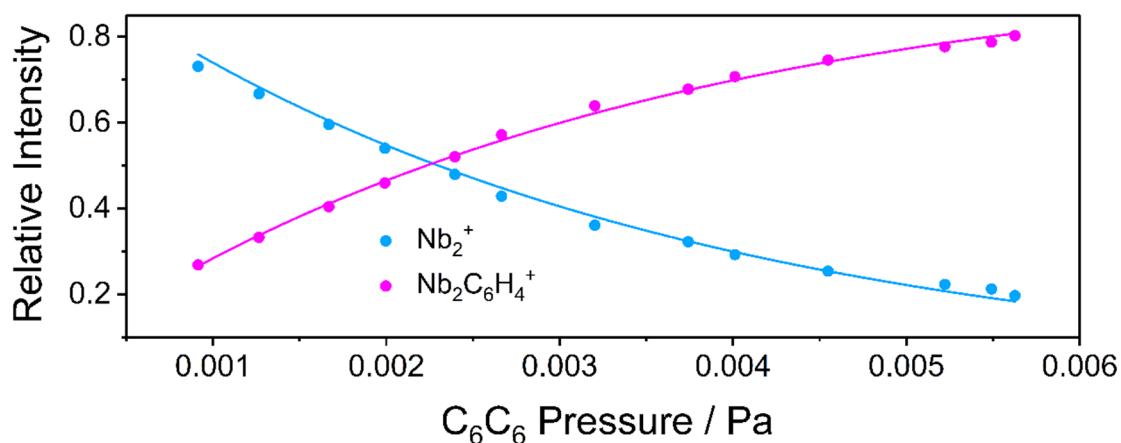

**Fig. S1** Variations of the relative intensities of the reactant and product cations in the reactions of  $Nb_2^+$  with  $C_6H_6$  relative to the  $C_6H_6$  pressures for 5 ms. The solid lines are fitted to the experimental data points by using the equations derived from the approximation of the pseudo-first-order reaction mode.

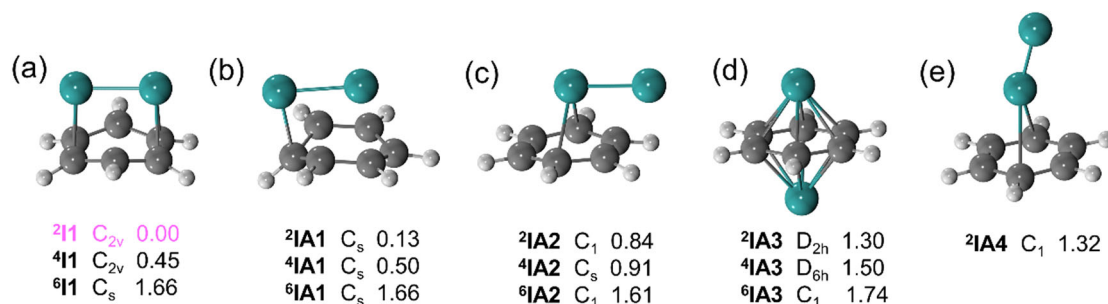

**Fig. S2** DFT-calculated structures and relative energies of  $Nb_2^+$  cluster on  $C_6H_6$ . The lowest-energy isomers of  $Nb_2C_6H_6^+$  are marked with a magenta color. The point group of each structure is also given, and the superscripts indicate the spin multiplicities. The zero-point vibration corrected energies ( $\Delta H_{0K}$  in eV) of each structure are given.

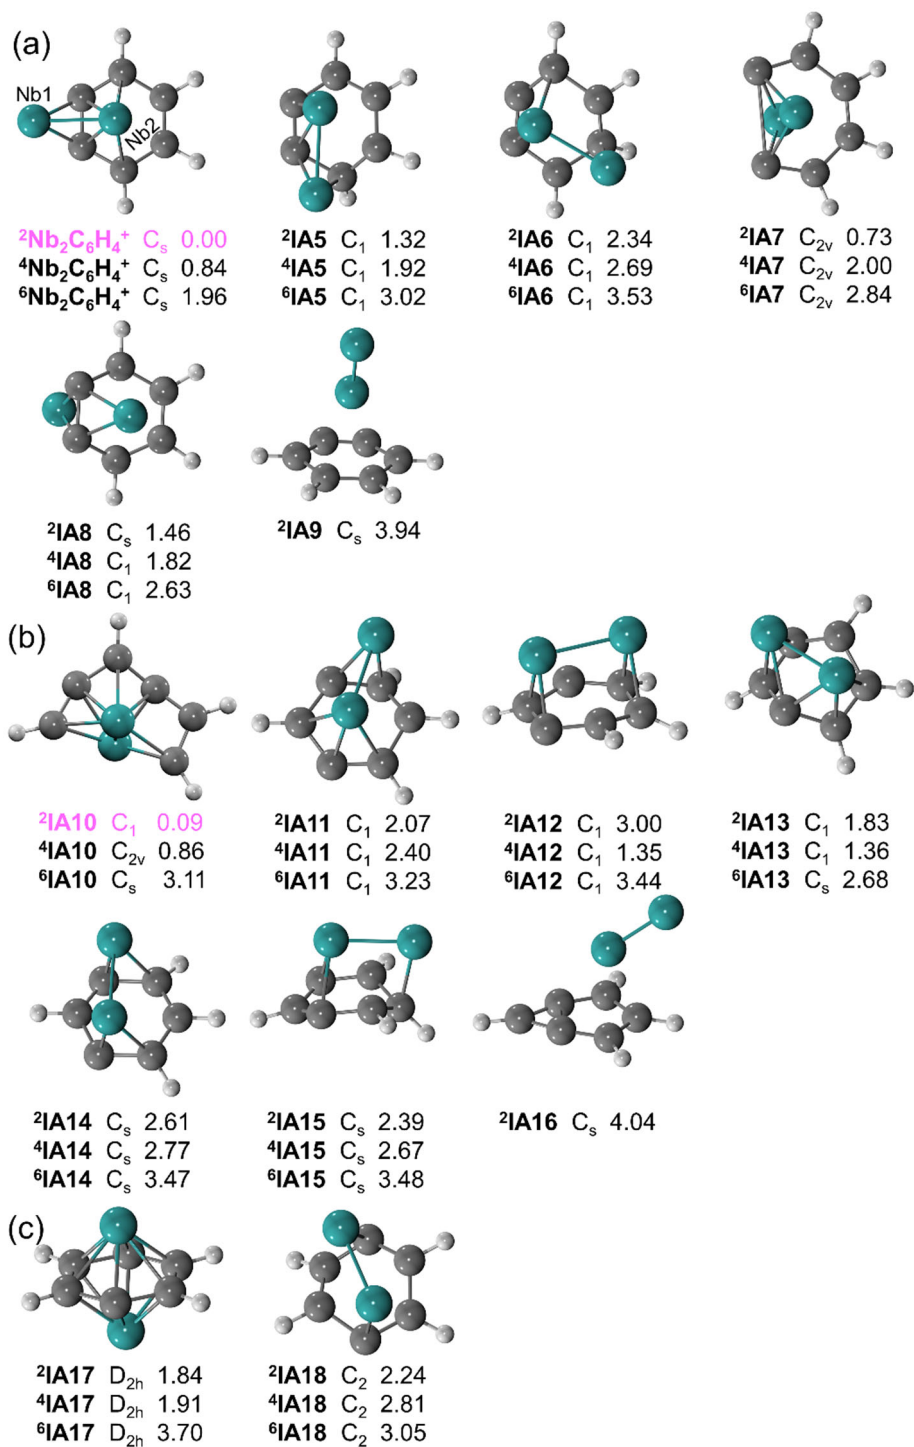

**Fig. S3** DFT-calculated structures and relative energies of  $\text{Nb}_2\text{C}_6\text{H}_4^+$ . The two lowest-energy isomers of  $\text{Nb}_2\text{C}_6\text{H}_4^+$  are marked with a magenta color.  $\text{C}_6\text{H}_4$  is designed with three types: (a) *ortho*-, (b) *meta*-, and (c) *para*-sites, respectively. Various adsorption modes of  $\text{Nb}_2^+$  are considered in each  $\text{C}_6\text{H}_4$  type. The point group of each structure is

given, and the superscripts indicate the spin multiplicities. The zero-point vibration corrected energies ( $\Delta H_{0K}$  in eV) of each structure are given.

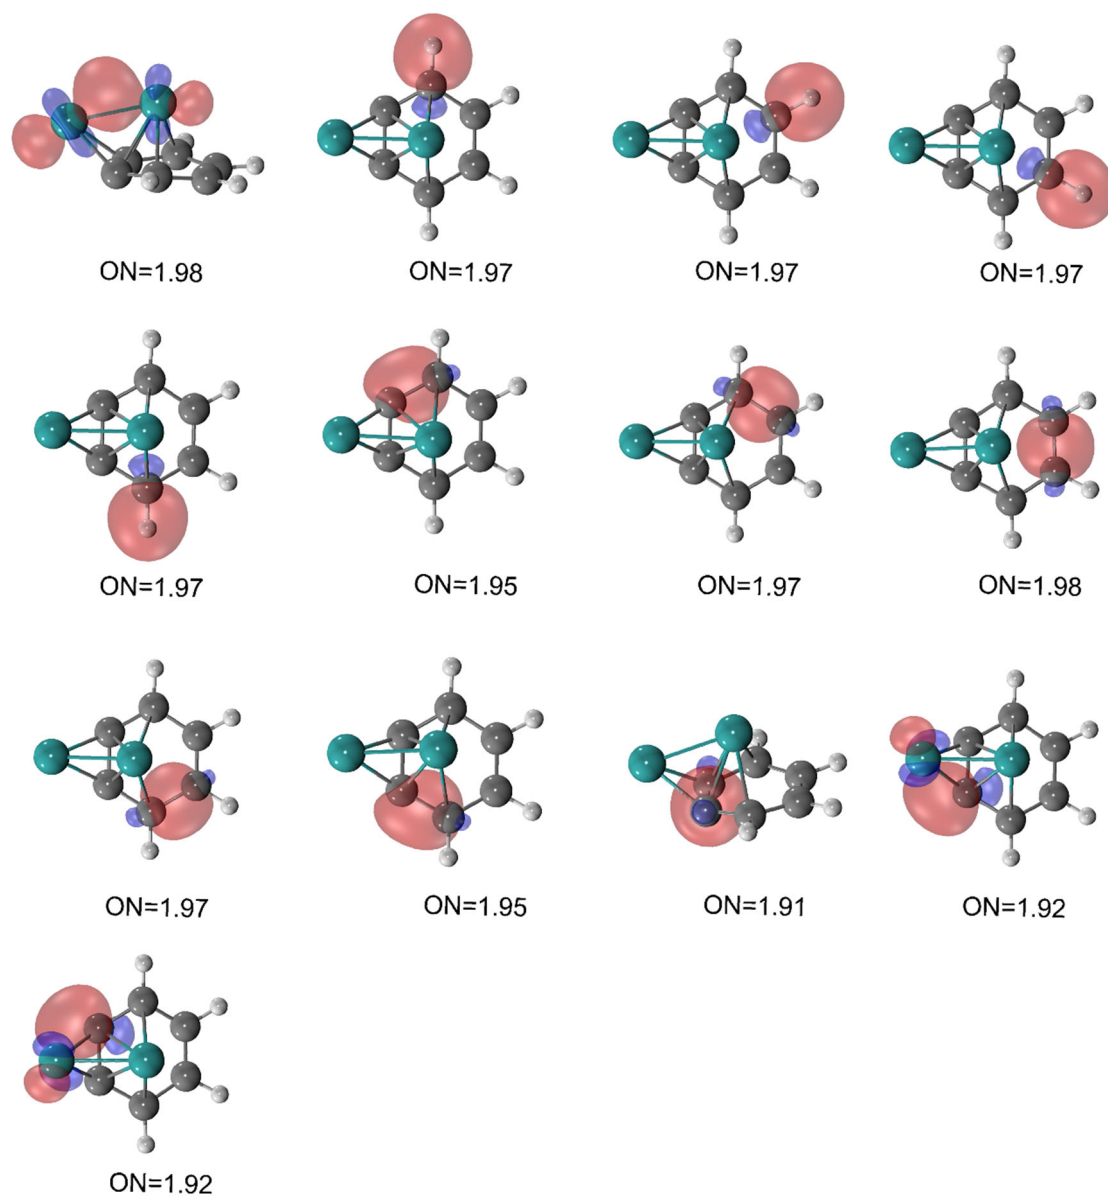

**Fig. S4** Adaptive natural density partitioning (AdNDP) bonding analysis for two-center two electron ( $2c-2e$ ) bonds in  $Nb_2C_6H_4^+$  cluster. ON stands for the occupation number. The red and blue colors represent the positive value and negative value, respectively.

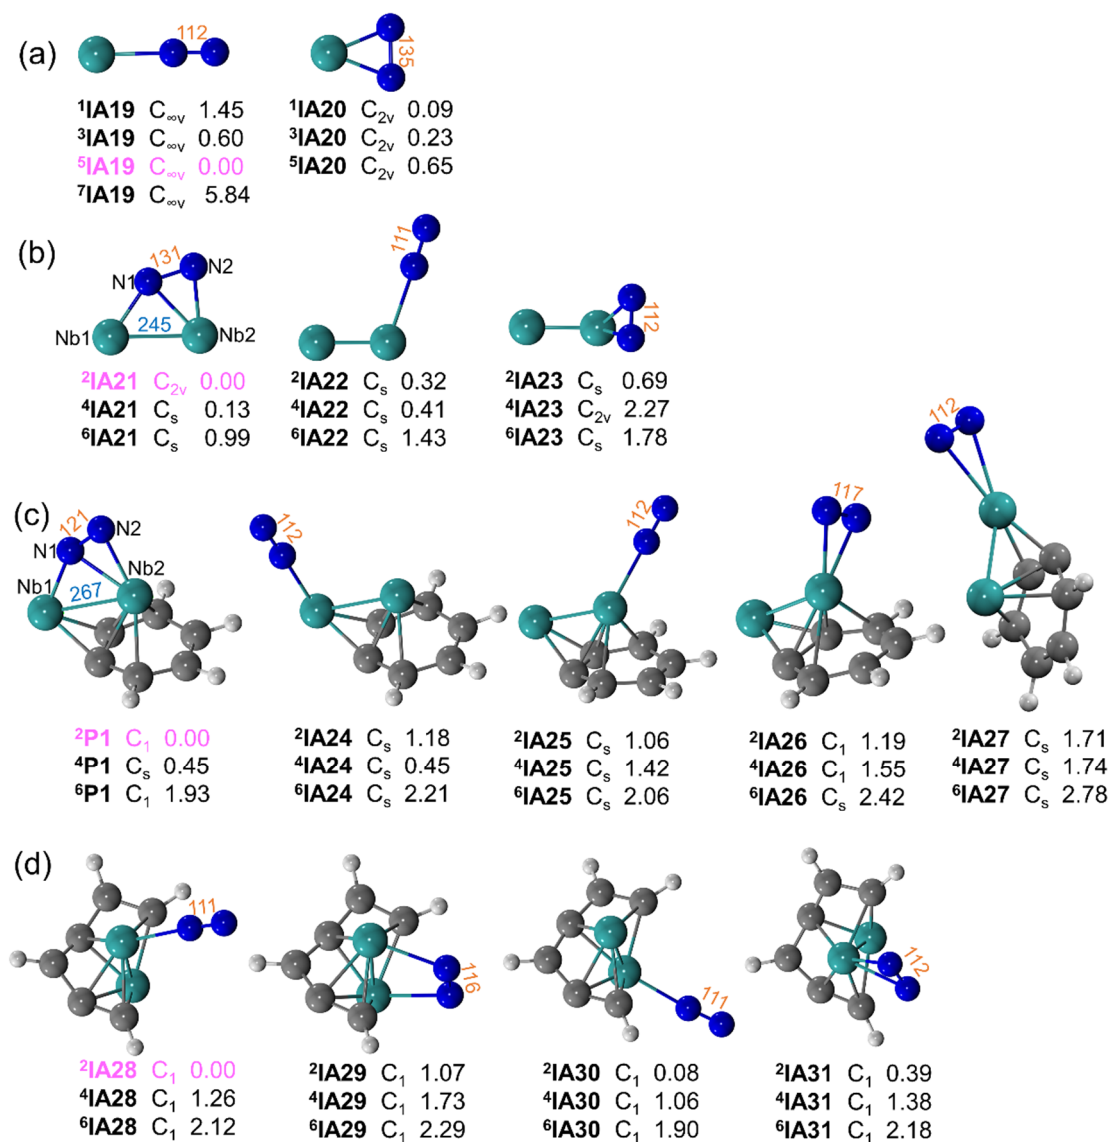

**Fig. S5** DFT-calculated structures and relative energies of (a)  $\text{NbN}_2^+$ , (b)  $\text{Nb}_2\text{N}_2^+$ , and (c) (d)  $\text{Nb}_2\text{C}_6\text{H}_4\text{N}_2^+$ . The lowest-energy structure in each type is marked with a magenta color. Two isomers of  $\text{Nb}_2\text{C}_6\text{H}_4\text{N}_2^+$  is considered in (c) and (d). Note that there is a significantly larger  $\text{N}_2$  adsorption energy (1.20 eV) in **P1** compared to **IA28**. The point group and  $\text{N}_2$  bond length are given in each structure, the superscripts indicate the spin multiplicities. The zero-point vibration corrected energies ( $\Delta H_{0K}$  in eV) of each structure are given.

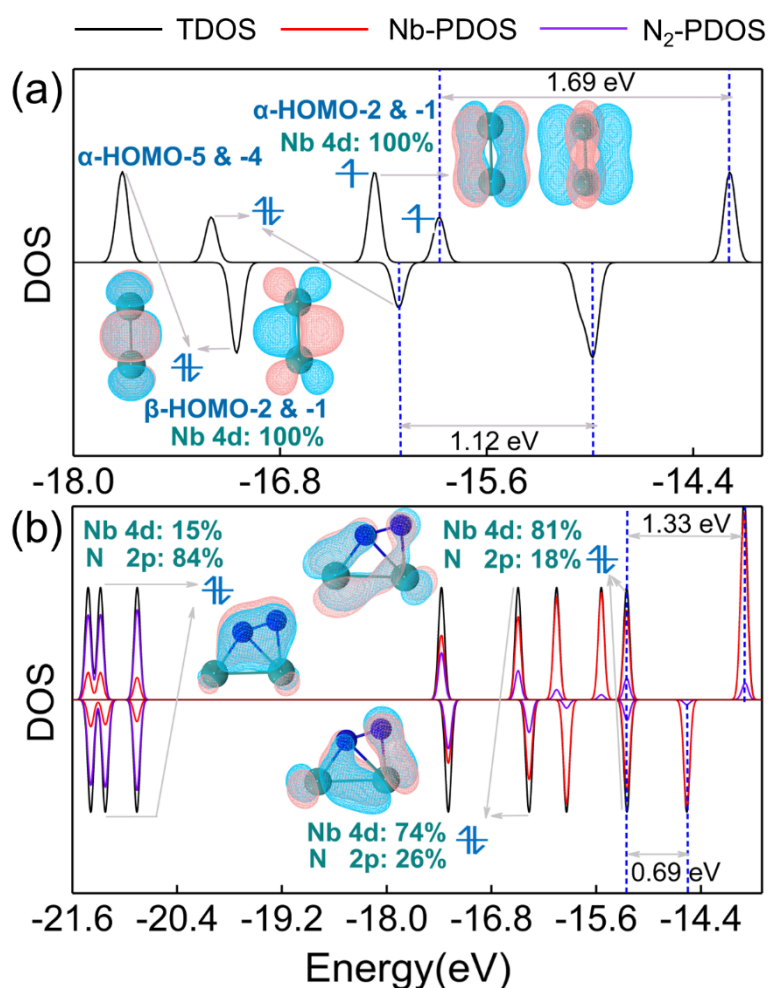

**Fig. S6** Total density of states (TDOS, black line) for (a) Nb<sub>2</sub><sup>+</sup> and (b) Nb<sub>2</sub>N<sub>2</sub><sup>+</sup>. Projected density of states (PDOS) of Nb (red line) and N<sub>2</sub> (purple line) are also given. In each panel, the HOMO position is indicated by the blue dotted line. The HOMO-LUMO energy gaps are also given. The orbital insets are shown to illustrate the bond interactions between the Nb<sub>2</sub><sup>+</sup> cluster and N<sub>2</sub>. The corresponding orbital contribution for Nb and N are also presented.

## References

- 1 K. Balasubramanian and X. L. Zhu, *J. Chem. Phys.*, 2001, **114**, 10375–10388.
- 2 A. Sevy, D. J. Matthew and M. D. Morse, *J. Chem. Phys.*, 2018, **149**, 044306.
- 3 Q. Wu and S. Yang, *Int. J. Mass. Spectrom.*, 1999, **184**, 57–65
- 4 K. P. Huber and G. Herzberg, *Molecular Spectra and Molecular Structure Constants of Diatomic Molecules*, Van Nostrand, New York, 1979.
- 5 G. Herzberg, *J. Mol. Spectrosc.*, 1970, **33**, 147–163.
